# Supplementary material for: Metabolic Fingerprinting of Murine L929 Fibroblasts as a Cell-Based Tumour Suppressor Model System for Methionine Restriction
Source: PubMed Central journal article supplement (PMC8002350; doi:10.3390/ijms22063039), 2021-03-16

# Total Overview Result LC/MS

| Media                    |               | 24h Met(+) | 48h Met(+) | 72h Met(+) | 96h Met(+) | 120h Met(+) | 24h Met(-) | 48h Met(-) | 72h Met(-) | 96h Met(-) | 120h Met(-) |
|--------------------------|---------------|------------|------------|------------|------------|-------------|------------|------------|------------|------------|-------------|
| Class                    | Compound      |            |            |            |            |             |            |            |            |            |             |
| Amino Acids              | Alanine       | 228        | 388        | 478        | 505        | 414         | 150        | 249        | 306        | 291        | 314         |
|                          | Arginine      | 87         | 97         | 99         | 99         | 93          | 95         | 100        | 104        | 101        | 89          |
|                          | Asparagine    | 108        | 113        | 114        | 112        | 97          | 114        | 122        | 129        | 130        | 126         |
|                          | Aspartate     | 104        | 118        | 119        | 123        | 124         | 115        | 128        | 137        | 137        | 133         |
|                          | Cysteine      | 145        | 129        | 120        | 114        | 98          | 150        | 137        | 131        | 128        | 121         |
|                          | Glutamate     | 132        | 178        | 226        | 232        | 274         | 142        | 184        | 217        | 220        | 239         |
|                          | Glutamine     | 83         | 67         | 38         | 27         | 21          | 105        | 99         | 94         | 95         | 93          |
|                          | Glycine       | 136        | 209        | 292        | 338        | 494         | 149        | 223        | 273        | 274        | 309         |
|                          | Proline       | 109        | 98         | 86         | 87         | 78          | 119        | 128        | 137        | 137        | 134         |
|                          | Serine        | 74         | 41         | 20         | 24         | 28          | 81         | 68         | 64         | 76         | 78          |
|                          | Methionine    | 86         | 71         | 46         | 41         | 17          | 69         | 38         | 22         | 18         | 14          |
|                          | Histidine     | 111        | 113        | 99         | 100        | 92          | 126        | 139        | 150        | 156        | 151         |
|                          | Isoleucine    | 79         | 68         | 50         | 44         | 20          | 90         | 89         | 93         | 98         | 101         |
|                          | Leucine       | 87         | 77         | 50         | 43         | 18          | 106        | 104        | 112        | 126        | 128         |
|                          | Lysine        | 74         | 70         | 57         | 55         | 47          | 84         | 84         | 78         | 77         | 64          |
|                          | Phenylalanine | 98         | 87         | 58         | 56         | 34          | 120        | 134        | 150        | 163        | 175         |
|                          | Threonine     | 81         | 79         | 68         | 71         | 54          | 93         | 101        | 111        | 117        | 117         |
| Tryptophan               | 84            | 72         | 49         | 44         | 26         | 107         | 115        | 126        | 132        | 143        |             |
| Tyrosine                 | 82            | 77         | 66         | 63         | 52         | 99          | 105        | 112        | 114        | 125        |             |
| Valine                   | 96            | 102        | 100        | 102        | 94         | 110         | 121        | 128        | 134        | 132        |             |
| Amino Acid Derivatives   | Cystine       | 654        | 265        | 46         | 53         | 0           | #####      | #####      | #####      | #####      | #####       |
|                          | GSH           | 253        | 337        | 519        | 227        | 200         | 130        | 137        | 147        | 147        | 142         |
|                          | GSSG          | #####      | #####      | #####      | #####      | #####       | #####      | #####      | #####      | #####      | #####       |
|                          | Homocystein   | 101        | 116        | 127        | 130        | 126         | 109        | 120        | 130        | 137        | 147         |
|                          | Homoserine    | 78         | 90         | 102        | 111        | 119         | 86         | 104        | 125        | 139        | 131         |
|                          | S-Adenosylho  | 83         | 49         | 22         | 18         | 17          | 60         | 51         | 39         | 51         | 37          |
|                          | S-Adenosylme  | 80         | 76         | 65         | 62         | 51          | 98         | 105        | 112        | 113        | 120         |
|                          | Cystathionin  | 104        | 127        | 147        | 162        | 199         | 123        | 142        | 165        | 175        | 183         |
|                          | Cysteamine    | 99         | 1442       | 7813       | 9363       | 25473       | #####      | #####      | #####      | #####      | #####       |
|                          | Taurine       | 88         | 42         | 25         | 18         | 20          | 102        | 107        | 119        | 124        | 141         |
|                          | CoA           | 129        | 151        | 161        | 171        | 176         | 150        | 162        | 178        | 184        | 179         |
|                          | Acetylglycin  | 97         | 110        | 76         | 69         | 149         | #####      | #####      | #####      | #####      | #####       |
|                          | Choline       | 1534       | 2497       | 2740       | 3056       | 2884        | 1701       | 3194       | 3591       | 3179       | 3089        |
|                          | Betaine       | 4109       | 6346       | 7198       | 7482       | 6486        | 4390       | 6847       | 6939       | 6219       | 6205        |
|                          | Aminobutyr    | 2690       | 4145       | 4569       | 5178       | 4765        | 3047       | 4378       | 4869       | 4670       | 4670        |
|                          | GABA          | 76         | 85         | 95         | 109        | 127         | 105        | 132        | 218        | 233        | 297         |
|                          | Hydroxybuty   | 102        | 110        | 91         | 109        | 104         | 139        | 148        | 160        | 159        | 175         |
|                          | Hydroxyproli  | 126        | 167        | 213        | 216        | 253         | 138        | 180        | 212        | 218        | 222         |
|                          | Phenylpyruva  | 89         | 73         | 41         | 35         | 12          | 105        | 109        | 118        | 127        | 131         |
|                          | Creatine      | 113        | 122        | 120        | 120        | 113         | 131        | 147        | 159        | 167        | 162         |
|                          | Creatinine    | 101        | 79         | 28         | 24         | 13          | 119        | 104        | 89         | 110        | 115         |
|                          | Carnitine     | #####      | #####      | #####      | #####      | #####       | #####      | #####      | #####      | #####      | #####       |
|                          | Spermidine    | 98         | 96         | 87         | 83         | 81          | 107        | 110        | 120        | 122        | 123         |
|                          | 3-Methyl-2-ol | 102        | 115        | 119        | 120        | 105         | 110        | 110        | 112        | 111        | 108         |
|                          | 4-Methyl-2-ol | #####      | #####      | #####      | #####      | #####       | #####      | #####      | #####      | #####      | #####       |
|                          | 5-Hydroxytry  | 55         | 53         | 43         | 43         | 34          | 88         | 87         | 86         | 87         | 83          |
|                          | 3-Hydroxykry  | 267        | 824        | 1360       | 1433       | 1663        | 256        | 605        | 859        | 779        | 883         |
| Kynurenine               | 503           | 320        | 364        | 294        | 239        | 250         | 231        | 184        | 151        | 137        |             |
| N-Formylkyn              | 73            | 80         | 86         | 86         | 80         | 87          | 92         | 94         | 91         | 105        |             |
| Quinolinic Ac            | 81            | 79         | 68         | 71         | 54         | 93          | 101        | 111        | 117        | 117        |             |
| Serotonine (5            | 112           | 143        | 204        | 228        | 365        | 127         | 149        | 176        | 183        | 200        |             |
| Urea Cycle               | Carbamoylph   | 53         | 83         | 115        | 125        | 167         | 57         | 74         | 91         | 89         | 96          |
|                          | Citrulline    | 122        | 121        | 143        | 147        | 142         | 112        | 128        | 147        | 133        | 129         |
|                          | ArgSucc       | 96         | 92         | 69         | 62         | 24          | 94         | 90         | 84         | 88         | 89          |
|                          | Ornithine     | 99         | 111        | 126        | 127        | 129         | 106        | 114        | 118        | 116        | 119         |
|                          | N-Acetylornit | 81         | 81         | 105        | 129        | 125         | 62         | 101        | 126        | 157        | 154         |
| TCA Cycle                | Citrate       | 174        | 295        | 558        | 637        | 1100        | 202        | 343        | 475        | 456        | 516         |
|                          | Aconitate     | 773        | 1505       | 2930       | 3202       | 5354        | 795        | 1326       | 1826       | 1531       | 2128        |
|                          | α-Ketoglutar  | 143        | 132        | 136        | 148        | 168         | 121        | 123        | 130        | 134        | 153         |
|                          | Succinate     | 106        | 124        | 135        | 143        | 154         | 115        | 132        | 141        | 149        | 144         |
|                          | Fumarate      | 223        | 186        | 219        | 258        | 306         | 174        | 178        | 222        | 233        | 268         |
| Carbohydrate Metabolites | Malate        | 114        | 130        | 143        | 151        | 164         | 120        | 132        | 140        | 144        | 143         |
|                          | Hexosephosp   | 937        | 678        | 724        | 739        | 760         | 450        | 410        | 365        | 314        | 307         |
|                          | Fructose-1,6- | 435        | 156        | 87         | 52         | 44          | 99         | 154        | 125        | 47         | 37          |
|                          | Dihydroxyace  | 85         | 102        | 106        | 108        | 90          | 109        | 115        | 120        | 134        | 116         |
|                          | 3-Phosphogly  | #####      | #####      | #####      | #####      | #####       | #####      | #####      | #####      | #####      | #####       |
|                          | Phosphoenol   | #####      | #####      | #####      | #####      | #####       | #####      | #####      | #####      | #####      | #####       |
|                          | Pyruvate      | 829        | 629        | 280        | 211        | 659         | 1458       | 499        | 557        | 431        | 794         |
|                          | Lactate       | 104        | 120        | 139        | 137        | 158         | 105        | 112        | 124        | 127        | 130         |
|                          | 6-Phosphoglu  | 108        | 76         | 56         | 43         | 31          | 114        | 98         | 80         | 76         | 65          |
|                          | Gluconate     | 116        | 151        | 211        | 284        | 328         | 213        | 265        | 393        | 418        | 484         |
|                          | Pentose-5-ph  | 507        | 703        | 950        | 1275       | 1443        | 446        | 596        | 813        | 1055       | 1379        |
|                          | Erythrose-4-p | 520        | 885        | 1366       | 1545       | 2087        | 403        | 626        | 865        | 951        | 1037        |
|                          | Deoxyribose-  | 171        | 285        | 337        | 338        | 344         | 163        | 187        | 219        | 234        | 255         |
|                          | Glucosamine   | 180        | 190        | 194        | 214        | 185         | 182        | 209        | 228        | 236        | 238         |
| Lipids                   | Glucosamine   | #####      | #####      | #####      | #####      | #####       | #####      | #####      | #####      | #####      | #####       |
|                          | Glycerol-3-ph | 98436      | #####      | #####      | #####      | #####       | 3499       | 3389       | 2957       | 7622       | 9045        |
|                          | N-Acetylneur  | 1039       | 1894       | 2380       | 3691       | 4632        | 998        | 1140       | 1007       | 1214       | 2585        |
|                          | Acetoacetate  | 106        | 118        | 125        | 128        | 128         | 123        | 134        | 144        | 146        | 143         |
|                          | Mevalonate    | #####      | #####      | #####      | #####      | #####       | #####      | #####      | #####      | #####      | #####       |

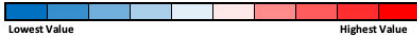

| Cells                  |               | 24h Met(+) | 48h Met(+) | 72h Met(+) | 96h Met(+) | 120h Met(+) | 24h Met(-) | 48h Met(-) | 72h Met(-) | 96h Met(-) | 120h Met(-) |
|------------------------|---------------|------------|------------|------------|------------|-------------|------------|------------|------------|------------|-------------|
| Class                  | Compound      |            |            |            |            |             |            |            |            |            |             |
| Amino Acids            | Alanine       | 66         | 84         | 88         | 98         | 100         | 56         | 43         | 34         | 29         | 27          |
|                        | Arginine      | 80         | 93         | 92         | 87         | 91          | 83         | 94         | 89         | 98         | 100         |
|                        | Asparagine    | 80         | 98         | 85         | 94         | 100         | 74         | 43         | 33         | 39         | 35          |
|                        | Aspartate     | 100        | 78         | 57         | 77         | 69          | 89         | 59         | 49         | 56         | 40          |
|                        | Cysteine      | 77         | 81         | 87         | 91         | 100         | 82         | 63         | 72         | 85         | 80          |
|                        | Glutamate     | 95         | 85         | 99         | 97         | 100         | 75         | 68         | 62         | 62         | 47          |
|                        | Glutamine     | 47         | 70         | 81         | 93         | 100         | 59         | 56         | 73         | 84         | 81          |
|                        | Glycine       | 87         | 93         | 83         | 95         | 100         | 87         | 68         | 53         | 52         | 44          |
|                        | Proline       | 96         | 100        | 79         | 91         | 90          | 94         | 61         | 52         | 55         | 41          |
|                        | Serine        | 66         | 62         | 81         | 100        | 92          | 58         | 44         | 44         | 56         | 54          |
|                        | Methionine    | 78         | 98         | 91         | 93         | 100         | 16         | 19         | 20         | 19         | 21          |
|                        | Histidine     | 75         | 100        | 85         | 97         | 97          | 80         | 70         | 53         | 63         | 55          |
|                        | Isoleucine    | 79         | 100        | 81         | 85         | 80          | 84         | 81         | 69         | 80         | 76          |
|                        | Leucine       | 70         | 100        | 87         | 95         | 91          | 84         | 82         | 69         | 80         | 70          |
|                        | Lysine        | 63         | 70         | 78         | 73         | 72          | 66         | 79         | 88         | 96         | 100         |
|                        | Phenylalanine | 75         | 100        | 91         | 100        | 100         | 82         | 80         | 65         | 74         | 67          |
|                        | Threonine     | 80         | 93         | 89         | 95         | 100         | 73         | 67         | 54         | 64         | 64          |
| Tryptophan             | 66            | 100        | 79         | 90         | 90         | 74          | 70         | 55         | 63         | 56         |             |
| Tyrosine               | 83            | 100        | 86         | 89         | 88         | 90          | 92         | 81         | 91         | 93         |             |
| Valine                 | 85            | 99         | 92         | 99         | 100        | 89          | 84         | 76         | 86         | 82         |             |
| Amino Acid Derivatives | Cystine       | 60         | 35         | 16         | 70         | 55          | 46         | 41         | 26         | 100        | 62          |
|                        | GSH           | 59         | 100        | 27         | 70         | 56          | 50         | 57         | 73         | 65         | 55          |
|                        | GSSG          | 16         | 27         | 33         | 62         | 100         | 20         | 17         | 18         | 17         | 11          |
|                        | Homocystein   | 61         | 79         | 74         | 82         | 100         | 58         | 29         | 20         | 30         | 27          |
|                        | Homoserine    | 62         | 100        | 70         | 94         | 97          | 91         | 91         | 71         | 96         | 77          |
|                        | S-Adenosylho  | 62         | 100        | 68         | 84         | 76          | 72         | 80         | 57         | 70         | 64          |
|                        | S-Adenosylme  | 82         | 100        | 85         | 87         | 87          | 88         | 92         | 80         | 90         | 92          |
|                        | Cystathionin  | 100        | 71         | 40         | 49         | 47          | 74         | 60         | 48         | 51         | 39          |
|                        | Cysteamine    | 100        | 77         | 75         | 85         | 59          | 79         | 36         | 37         | 32         | 30          |
|                        | Taurine       | 100        | 75         | 54         | 58         | 53          | 79         | 65         | 60         | 53         | 40          |
|                        | CoA           | 92         | 100        | 80         | 89         | 81          | 97         | 90         | 81         | 92         | 83          |
|                        | Acetylglycin  | 100        | 46         | 53         | 83         | 67          | 96         | 56         | 43         | 25         | 18          |
|                        | Choline       | 72         | 86         | 85         | 100        | 86          | 73         | 73         | 63         | 67         | 63          |
|                        | Betaine       | 69         | 100        | 78         | 97         | 70          | 69         | 62         | 41         | 47         | 42          |
|                        | Aminobutyr    | 46         | 82         | 76         | 100        | 76          | 56         | 55         | 41         | 49         | 44          |
|                        | GABA          | 63         | 100        | 77         | 94         | 88          | 70         | 79         |            |            |             |

| Media         |              | 24h Met(+)  | 48h Met(+) | 72h Met(+) | 96h Met(+) | 120h Met(+) | 24h Met(-) | 48h Met(-) | 72h Met(-) | 96h Met(-) | 120h Met(-) |       |
|---------------|--------------|-------------|------------|------------|------------|-------------|------------|------------|------------|------------|-------------|-------|
| Class         | Compound     |             |            |            |            |             |            |            |            |            |             |       |
| Pyrimidines   | Carbamoylasg | 181         | 324        | 668        | 603        | 938         | 161        | 241        | 249        | 243        | 219         |       |
|               | Dihydroorota | #####       | #####      | #####      | #####      | #####       | #####      | #####      | #####      | #####      | #####       |       |
|               | Orotate      | #####       | #####      | #####      | #####      | #####       | #####      | #####      | #####      | #####      | #####       |       |
|               | Uracil       | #####       | #####      | #####      | #####      | #####       | #####      | #####      | #####      | #####      | #####       |       |
|               | Uridin       | 2           | 3          | 14         | 0          | 1           | 2          | 3          | 5          | 1          | 7           |       |
|               | UMP          | 231         | 220        | 200        | 200        | 184         | 241        | 232        | 221        | 211        | 196         |       |
|               | UDP          | #####       | #####      | #####      | #####      | #####       | #####      | #####      | #####      | #####      | #####       |       |
|               | UTP          | #####       | #####      | #####      | #####      | #####       | #####      | #####      | #####      | #####      | #####       |       |
|               | dUridine     | #####       | #####      | #####      | #####      | #####       | #####      | #####      | #####      | #####      | #####       |       |
|               | dUMP         | #####       | #####      | #####      | #####      | #####       | #####      | #####      | #####      | #####      | #####       |       |
|               | dUDP         | 112         | 134        | 161        | 177        | 198         | 137        | 161        | 182        | 197        | 189         |       |
|               | dUTP         | #####       | #####      | #####      | #####      | #####       | #####      | #####      | #####      | #####      | #####       |       |
|               | UDP-Glc      | 98          | 102        | 97         | 100        | 82          | 115        | 126        | 130        | 136        | 136         |       |
|               | UDP-Glucuro  | #####       | #####      | #####      | #####      | #####       | #####      | #####      | #####      | #####      | #####       |       |
|               | Cytosin      | #####       | #####      | #####      | #####      | #####       | #####      | #####      | #####      | #####      | #####       |       |
|               | Cytidin      | #####       | #####      | #####      | #####      | #####       | #####      | #####      | #####      | #####      | #####       |       |
|               | CMP          | 4068        | 10843      | 7356       | 4366       | 4530        | 1807       | 1433       | 933        | 493        | 1018        |       |
|               | CDP          | 147         | 122        | 114        | 125        | 107         | 128        | 144        | 153        | 165        | 171         |       |
|               | CTP          | #####       | #####      | #####      | #####      | #####       | #####      | #####      | #####      | #####      | #####       |       |
|               | dCytidine    | #####       | #####      | #####      | #####      | #####       | #####      | #####      | #####      | #####      | #####       |       |
|               | dCMP         | #####       | #####      | #####      | #####      | #####       | #####      | #####      | #####      | #####      | #####       |       |
|               | dCDP         | 293         | 190        | 166        | 178        | 198         | 309        | 194        | 121        | 123        | 204         |       |
|               | dCTP         | 94          | 108        | 115        | 121        | 124         | 111        | 123        | 132        | 133        | 135         |       |
|               | Thymin       | 223         | 211        | 148        | 111        | 103         | 239        | 166        | 116        | 106        | 112         |       |
| Thymidine     | #####        | #####       | #####      | #####      | #####      | #####       | #####      | #####      | #####      | #####      |             |       |
| TMP           | #####        | #####       | #####      | #####      | #####      | #####       | #####      | #####      | #####      | #####      |             |       |
| TDP           | #####        | #####       | #####      | #####      | #####      | #####       | #####      | #####      | #####      | #####      |             |       |
| TTP           | #####        | #####       | #####      | #####      | #####      | #####       | #####      | #####      | #####      | #####      |             |       |
| dThymidine    | #####        | #####       | #####      | #####      | #####      | #####       | #####      | #####      | #####      | #####      |             |       |
| dTMP          | 36           | 44          | 100        | 42         | 42         | 42          | 42         | 53         | 43         | 48         |             |       |
| dTDP          | 1            | 8           | 109        | 0          | 0          | 4           | 3          | 11         | 0          | 5          |             |       |
| dTTP          | #####        | #####       | #####      | #####      | #####      | #####       | #####      | #####      | #####      | #####      |             |       |
| Purines       | Inosin       | 462         | 514        | 538        | 599        | 871         | 176        | 141        | 147        | 299        | 1776        |       |
|               | dInosin      | 244         | 429        | 583        | 451        | 540         | 166        | 362        | 402        | 519        | 754         |       |
|               | IMP          | #####       | #####      | #####      | #####      | #####       | #####      | #####      | #####      | #####      | #####       |       |
|               | Adenin       | 1827        | 1149       | 1443       | 1784       | 1574        | 989        | 817        | 846        | 1085       | 1440        |       |
|               | Adenosin     | #####       | #####      | #####      | #####      | #####       | #####      | #####      | #####      | #####      | #####       |       |
|               | AMP          | #####       | #####      | #####      | #####      | #####       | #####      | #####      | #####      | #####      | #####       |       |
|               | ADP          | 0           | 0          | 0          | 0          | 0           | #####      | #####      | #####      | #####      | #####       |       |
|               | ATP          | #####       | #####      | #####      | #####      | #####       | #####      | #####      | #####      | #####      | #####       |       |
|               | cAMP         | #####       | #####      | #####      | #####      | #####       | #####      | #####      | #####      | #####      | #####       |       |
|               | dAMP         | #####       | #####      | #####      | #####      | #####       | #####      | #####      | #####      | #####      | #####       |       |
|               | dADP         | #####       | #####      | #####      | #####      | #####       | #####      | #####      | #####      | #####      | #####       |       |
|               | dATP         | #####       | #####      | #####      | #####      | #####       | #####      | #####      | #####      | #####      | #####       |       |
|               | Guanin       | #####       | #####      | #####      | #####      | #####       | #####      | #####      | #####      | #####      | #####       |       |
|               | Guanosin     | 335         | 11444      | 78         | 34         | 427         | 39         | 111        | 489        | 594        | 1010        |       |
|               | GMP          | 168         | 118        | 131        | 97         | 95          | 102        | 119        | 118        | 112        | 134         |       |
|               | GDP          | 3           | 2          | 2          | 2          | 2           | 4          | 4          | 16         | 18         | 30          |       |
|               | GTP          | #####       | #####      | #####      | #####      | #####       | #####      | #####      | #####      | #####      | #####       |       |
|               | Hypoxanthin  | 147         | 463        | 297        | 275        | 514         | 84         | 204        | 433        | 395        | 1299        |       |
|               | Xanthin      | 128         | 155        | 170        | 183        | 199         | 147        | 168        | 205        | 225        | 267         |       |
|               | Xanthosin    | 87          | 75         | 81         | 57         | 72          | 91         | 72         | 65         | 38         | 32          |       |
|               | Xanthurenic  | #####       | #####      | #####      | #####      | #####       | #####      | #####      | #####      | #####      | #####       |       |
|               | XMP          | #####       | #####      | #####      | #####      | #####       | #####      | #####      | #####      | #####      | #####       |       |
|               | Co-Factors   | Riboflavine | #####      | #####      | #####      | #####       | #####      | #####      | #####      | #####      | #####       | ##### |
|               |              | FMN         | #####      | #####      | #####      | #####       | #####      | #####      | #####      | #####      | #####       | ##### |
| FMNH2         |              | #####       | #####      | #####      | #####      | #####       | #####      | #####      | #####      | #####      | #####       |       |
| FAD           |              | #####       | #####      | #####      | #####      | #####       | #####      | #####      | #####      | #####      | #####       |       |
| FADH2         |              | #####       | #####      | #####      | #####      | #####       | #####      | #####      | #####      | #####      | #####       |       |
| Nicotinamide  |              | #####       | #####      | #####      | #####      | #####       | #####      | #####      | #####      | #####      | #####       |       |
| Nicotinate    |              | #####       | #####      | #####      | #####      | #####       | #####      | #####      | #####      | #####      | #####       |       |
| NAD+          |              | #####       | #####      | #####      | #####      | #####       | #####      | #####      | #####      | #####      | #####       |       |
| NADH          |              | #####       | #####      | #####      | #####      | #####       | #####      | #####      | #####      | #####      | #####       |       |
| NADP+         |              | #####       | #####      | #####      | #####      | #####       | #####      | #####      | #####      | #####      | #####       |       |
| NADPH         |              | 87          | 85         | 76         | 75         | 63          | 92         | 95         | 97         | 99         | 98          |       |
| Dihydrofolate |              | 113         | 117        | 119        | 123        | 123         | 125        | 137        | 152        | 162        | 194         |       |
| Tetrahydrofo  |              | 105         | 113        | 120        | 126        | 128         | 121        | 136        | 149        | 154        | 153         |       |
| 5-Methyl-THF  |              | 112         | 106        | 79         | 73         | 37          | 129        | 123        | 122        | 132        | 123         |       |
| Tetrahydrobi  |              | 57          | 52         | 68         | 67         | 64          | 78         | 69         | 94         | 78         | 62          |       |
| Thiamine(+)   |              | #####       | #####      | #####      | #####      | #####       | #####      | #####      | #####      | #####      | #####       |       |
| Thiamine pho  | #####        | #####       | #####      | #####      | #####      | #####       | #####      | #####      | #####      | #####      |             |       |
| Pantothenate  | 116          | 128         | 148        | 146        | 144        | 140         | 150        | 166        | 145        | 134        |             |       |
| Pyridoxine    | #####        | #####       | #####      | #####      | #####      | #####       | #####      | #####      | #####      | #####      |             |       |

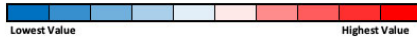

| Cells         |              | 24h Met(+)  | 48h Met(+) | 72h Met(+) | 96h Met(+) | 120h Met(+) | 24h Met(-) | 48h Met(-) | 72h Met(-) | 96h Met(-) | 120h Met(-) |       |
|---------------|--------------|-------------|------------|------------|------------|-------------|------------|------------|------------|------------|-------------|-------|
| Class         | Compound     |             |            |            |            |             |            |            |            |            |             |       |
| Pyrimidines   | Carbamoylasg | 49          | 43         | 74         | 100        | 14          | 8          | 54         | 7          | 52         | 3           |       |
|               | Dihydroorota | 91          | 48         | 31         | 60         | 35          | 100        | 40         | 34         | 40         | 30          |       |
|               | Orotate      | 100         | 84         | 60         | 87         | 74          | 98         | 97         | 73         | 77         | 46          |       |
|               | Uracil       | 92          | 37         | 11         | 29         | 15          | 100        | 10         | 9          | 14         | 42          |       |
|               | Uridin       | 99          | 77         | 58         | 79         | 54          | 100        | 78         | 54         | 70         | 43          |       |
|               | UMP          | 100         | 98         | 96         | 90         | 91          | 89         | 91         | 91         | 90         | 85          |       |
|               | UDP          | #####       | #####      | #####      | #####      | #####       | #####      | #####      | #####      | #####      | #####       |       |
|               | UTP          | 59          | 43         | 71         | 62         | 100         | 52         | 44         | 89         | 63         | 52          |       |
|               | dUridine     | 52          | 100        | 32         | 40         | 15          | 62         | 78         | 55         | 69         | 74          |       |
|               | dUMP         | 100         | 53         | 24         | 49         | 22          | 18         | 19         | 26         | 36         | 31          |       |
|               | dUDP         | 76          | 100        | 84         | 88         | 88          | 82         | 93         | 81         | 94         | 87          |       |
|               | dUTP         | #####       | #####      | #####      | #####      | #####       | #####      | #####      | #####      | #####      | #####       |       |
|               | UDP-Glc      | 53          | 77         | 35         | 17         | 12          | 58         | 84         | 69         | 100        | 92          |       |
|               | UDP-Glucuro  | 100         | 81         | 48         | 49         | 18          | 65         | 19         | 7          | 11         | 7           |       |
|               | Cytosin      | #####       | #####      | #####      | #####      | #####       | #####      | #####      | #####      | #####      | #####       |       |
|               | Cytidin      | #####       | #####      | #####      | #####      | #####       | #####      | #####      | #####      | #####      | #####       |       |
|               | CMP          | 67          | 95         | 78         | 100        | 86          | 71         | 88         | 69         | 69         | 65          |       |
|               | CDP          | 64          | 84         | 54         | 64         | 75          | 67         | 66         | 72         | 100        | 75          |       |
|               | CTP          | 58          | 55         | 27         | 0          | 100         | 58         | 0          | 0          | 0          | 95          |       |
|               | dCytidine    | 24          | 27         | 21         | 51         | 81          | 45         | 100        | 17         | 11         | 12          |       |
|               | dCMP         | #####       | #####      | #####      | #####      | #####       | #####      | #####      | #####      | #####      | #####       |       |
|               | dCDP         | 100         | 75         | 66         | 81         | 78          | 67         | 64         | 76         | 69         | 86          |       |
|               | dCTP         | 100         | 82         | 85         | 86         | 91          | 75         | 69         | 75         | 79         | 81          |       |
|               | Thymin       | 88          | 100        | 73         | 79         | 81          | 81         | 95         | 82         | 97         | 93          |       |
| Thymidine     | 50           | 77          | 84         | 64         | 0          | 50          | 42         | 100        | 0          | 36         |             |       |
| TMP           | 100          | 51          | 46         | 61         | 56         | 98          | 49         | 62         | 61         | 55         |             |       |
| TDP           | 57           | 53          | 91         | 100        | 65         | 47          | 33         | 34         | 31         | 16         |             |       |
| TTP           | 30           | 28          | 31         | 33         | 61         | 32          | 60         | 99         | 99         | 100        |             |       |
| dThymidine    | 88           | 81          | 68         | 100        | 68         | 91          | 84         | 59         | 71         | 53         |             |       |
| dTMP          | 94           | 93          | 98         | 100        | 96         | 76          | 89         | 63         | 41         | 20         |             |       |
| dTDP          | 96           | 92          | 98         | 100        | 95         | 76          | 89         | 64         | 41         | 18         |             |       |
| dTTP          | 91           | 39          | 14         | 46         | 22         | 100         | 10         | 6          | 17         | 45         |             |       |
| Purines       | Inosin       | 100         | 57         | 57         | 80         | 54          | 87         | 39         | 36         | 46         | 36          |       |
|               | dInosin      | 99          | 43         | 49         | 89         | 70          | 100        | 55         | 35         | 65         | 42          |       |
|               | IMP          | 84          | 67         | 62         | 93         | 66          | 100        | 77         | 79         | 93         | 61          |       |
|               | Adenin       | 53          | 64         | 58         | 85         | 70          | 67         | 100        | 92         | 100        | 67          |       |
|               | Adenosin     | 85          | 62         | 31         | 63         | 46          | 100        | 39         | 29         | 55         | 55          |       |
|               | AMP          | #####       | #####      | #####      | #####      | #####       | #####      | #####      | #####      | #####      | #####       |       |
|               | ADP          | 100         | 41         | 29         | 22         | 10          | 49         | 0          | 1          | 4          | 3           |       |
|               | ATP          | 100         | 89         | 61         | 49         | 23          | 47         | 13         | 7          | 6          | 7           |       |
|               | cAMP         | #####       | #####      | #####      | #####      | #####       | #####      | #####      | #####      | #####      | #####       |       |
|               | dAMP         | 100         | 61         | 30         | 15         | 20          | 11         | 9          | 0          | 0          | 19          |       |
|               | dADP         | 98          | 63         | 51         | 67         | 62          | 100        | 51         | 62         | 61         | 60          |       |
|               | dATP         | 72          | 85         | 68         | 76         | 79          | 67         | 100        | 87         | 72         | 52          |       |
|               | Guanin       | 100         | 46         | 2          | 31         | 21          | 98         | 8          | 1          | 15         | 50          |       |
|               | Guanosin     | 100         | 72         | 61         | 36         | 18          | 77         | 57         | 60         | 16         | 7           |       |
|               | GMP          | 100         | 53         | 50         | 57         | 60          | 76         | 38         | 36         | 31         | 18          |       |
|               | GDP          | 80          | 80         | 89         | 89         | 100         | 81         | 77         | 87         | 77         | 61          |       |
|               | GTP          | 81          | 88         | 89         | 89         | 97          | 78         | 81         | 100        | 91         | 87          |       |
|               | Hypoxanthin  | 87          | 66         | 80         | 86         | 100         | 83         | 64         | 78         | 65         | 45          |       |
|               | Xanthin      | 68          | 68         | 76         | 83         | 100         | 55         | 72         | 60         | 58         | 42          |       |
|               | Xanthosin    | 74          | 78         | 91         | 79         | 100         | 55         | 71         | 47         | 43         | 25          |       |
|               | Xanthurenic  | 71          | 56         | 70         | 74         | 100         | 68         | 52         | 55         | 32         | 29          |       |
|               | XMP          | 54          | 100        | 62         | 40         | 81          | 42         | 39         | 38         | 24         | 13          |       |
|               | Co-Factors   | Riboflavine | 52         | 100        | 72         | 76          | 60         | 64         | 81         | 52         | 67          | 44    |
|               |              | FMN         | #####      | #####      | #####      | #####       | #####      | #####      | #####      | #####      | #####       | ##### |
| FMNH2         |              | 65          | 70         | 88         | 97         | 100         | 69         | 66         | 74         | 77         | 54          |       |
| FAD           |              | #####       | #####      | #####      | #####      | #####       | #####      | #####      | #####      | #####      | #####       |       |
| FADH2         |              | 93          | 63         | 95         | 89         | 92          | 92         | 79         | 82         | 100        | 62          |       |
| Nicotinamide  |              | 35          | 0          | 48         | 32         | 100         | 72         | 11         | 0          | 0          | 9           |       |
| Nicotinate    |              | 78          | 45         | 42         | 65         | 62          | 100        | 68         | 70         | 73         | 11          |       |
| NAD+          |              | 64          | 41         | 35         | 62         | 75          | 100        | 87         | 52         | 94         | 23          |       |
| NADH          |              | 97          | 58         | 73         | 91         | 92          | 100        | 86         | 82         | 75         | 34          |       |
| NADP+         |              | 48          | 57         | 39         | 87         | 97          | 71         | 56         | 25         | 100        | 30          |       |
| NADPH         |              | 77          | 80         | 81         | 91         | 100         | 76         | 90         | 75         | 76         | 62          |       |
| Dihydrofolate |              | 94          | 72         | 70         | 68         | 68          | 71         | 84         | 75         | 73         | 70          |       |
| Tetrahydrofo  |              | 100         | 79         | 54         | 56         | 48          | 81         | 68         | 61         | 48         | 29          |       |
| 5-Methyl-THF  |              | 45          | 100        | 32         | 13         | 10          | 60         | 58         | 44         | 68         | 59          |       |
| Tetrahydrobi  |              | 100         | 95         | 86         | 84         | 71          | 92         | 71         | 64         | 66         | 66          |       |
| Thiamine(+)   |              | 5           | 3          | 2          | 1          | 0           | 8          | 60         | 98         | 100        | 93          |       |
| Thiamine pho  | 83           | 10          | 25         | 3          | 0          | 0           | 82         | 50         | 0          | 100        |             |       |
| Pantothenate  | 63           | 84          | 79         | 100        | 94         | 48          | 37         | 36         | 41         | 37         |             |       |
| Pyridoxine    | 100          | 90          | 76         | 82         | 72         | 98          | 67         | 36         | 63         | 60         |             |       |

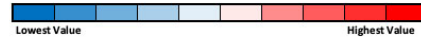

Supplement: ijms-22-03039-s001.pdf [file ijms-22-03039-s001.pdf]
